# Supplementary material for: Sulforaphane Is Protective against Warm Ischemia/Reperfusion Injury and Partial Hepatectomy in Rats
Source: MDPI journal article supplement (doi:10.3390/ijms25010579), 2024-01-01
Supplement: s1 [file s1]

**Supplementary Table S1 Primers used for RT-PCR to detect mRNA**

|               | Sequence (5' → 3')        | Direction | Length (bp) |
|---------------|---------------------------|-----------|-------------|
| CXCL1         | GCCAAGCCACAGGGGCGCCCGT    | Forward   | 231         |
|               | ACTTGGGGACACCCTTTAGCATC   | Reverse   |             |
| TNF- $\alpha$ | TCCCAACAAGGAGGAGAAGTTCC   | Forward   | 275         |
|               | GGCAGCCTTGTCCCTTGAAGAGA   | Reverse   |             |
| IL-10         | GCAGGACTTTAAGGGTTACTTGG   | Forward   | 245         |
|               | CCTTTGTCTTGGAGCTTATATAA   | Reverse   |             |
| MCL1          | CTGGGGCAGGATTGTGACTC      | Forward   | 169         |
|               | CACAAACCCATCCCAGCCTCTTTG  | Reverse   |             |
| HGF           | GCTACACTGGATTGATCAACGC    | Forward   | 169         |
|               | CCATAATCTCCCTCACAAGGTC    | Reverse   |             |
| IL-6          | GAGAAAAGAGTTGTGCAATGGCA   | Forward   | 137         |
|               | ATAGGCAAATTCCTGGTTATATCC  | Reverse   |             |
| IL-1 $\beta$  | TCTTTGAAGAAGAGCCCGTCCTC   | Forward   | 321         |
|               | GGATCCACACTCTCCAGCTGCA    | Reverse   |             |
| EF            | TCTGGTTGGAATGGTGACAACATGC | Forward   | 335         |
|               | CCAGGAAGAGCTTCACTCAAAGCTT | Reverse   |             |

*RT-PCR* reverse transcription-polymerase chain reaction, *bp* base pairs, *TNF- $\alpha$*  tumor necrosis factor-alpha, *CXCL1* C-X-C motif chemokine ligand 1, *IL* interleukin, *MCL1* myeloid cell leukemia 1, *HGF* hepatocyte growth factor, *EF* elongation factor 1 $\alpha$

**Supplementary Table S2 Histological index in the liver of HIRI+PH-treated rats**

|                                            |               |      | P value                |                       |
|--------------------------------------------|---------------|------|------------------------|-----------------------|
|                                            | Average $\pm$ | SD   | No treatment<br>vs SFN | HIRI+PH<br>3 h vs 6 h |
| <i>Suzuki score</i>                        |               |      |                        |                       |
| 3 h                                        |               |      |                        |                       |
| HIRI+PH                                    | 4.0 $\pm$     | 0.0  |                        |                       |
| HIRI+PH and SFN                            | 1.0 $\pm$     | 0.0  | 0.044                  |                       |
| 6 h                                        |               |      |                        |                       |
| HIRI+PH                                    | 9.3 $\pm$     | 1.2  |                        | 0.002                 |
| HIRI+PH and SFN                            | 3.5 $\pm$     | 1.7  | <0.001                 |                       |
| <i>TUNEL-positive cells/mm<sup>2</sup></i> |               |      |                        |                       |
| 3 h                                        |               |      |                        |                       |
| HIRI+PH                                    | 0.5 $\pm$     | 0.8  |                        |                       |
| HIRI+PH and SFN                            | 0.0 $\pm$     | 0.0  | 1.000                  |                       |
| 6 h                                        |               |      |                        |                       |
| HIRI+PH                                    | 169.0 $\pm$   | 45.9 |                        | <0.001                |
| HIRI+PH and SFN                            | 66.6 $\pm$    | 36.1 | 0.002                  |                       |
| <i>MPO-positive cells/mm<sup>2</sup></i>   |               |      |                        |                       |
| 3 h                                        |               |      |                        |                       |
| HIRI+PH                                    | 17.8 $\pm$    | 4.1  |                        |                       |
| HIRI+PH and SFN                            | 21.7 $\pm$    | 4.8  | 0.992                  |                       |
| 6 h                                        |               |      |                        |                       |
| HIRI+PH                                    | 79.2 $\pm$    | 29.5 |                        | 0.006                 |
| HIRI+PH and SFN                            | 31.6 $\pm$    | 6.3  | 0.018                  |                       |

No changes in pathological findings or no positive staining were clearly detected in the livers of control (0 h, naïve rats).

*HIRI+PH* hepatic ischemia/reperfusion injury and partial hepatectomy, *SFN* sulforaphane, *TUNEL* terminal deoxynucleotidyl transferase-mediated deoxyuridine nick-end labeling, *MPO* myeloperoxidase.

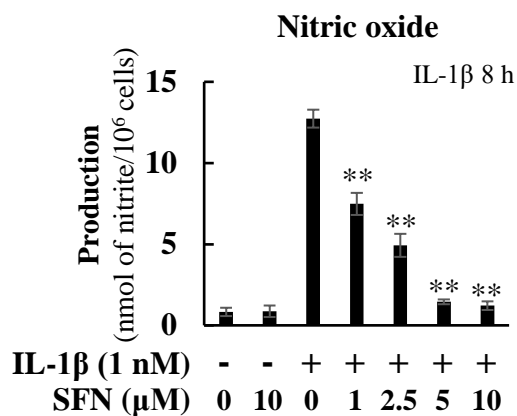

Supplementary figure S1. Dose-dependent effects of sulforaphane (SFN) on nitric oxide production in interleukin 1 $\beta$  (IL-1 $\beta$ )-stimulated hepatocytes. Cells were treated with IL-1 $\beta$  (1 nM) in the presence or absence of SFN (1 to 10  $\mu$ M) for 8 h. The medium concentration of nitrite, a metabolite of nitric oxide, was determined by the Griess method. \*\* $P < 0.01$  versus IL-1 $\beta$  alone. The values in the bar graphs represent the mean  $\pm$  standard deviation (SD;  $n = 3$  experiments).
